# Supplementary material for: Condition-specific RNA editing in the coral symbiont Symbiodinium microadriaticum
Source: PLoS Genet. 2017 Feb 28;13(2):e1006619. doi: 10.1371/journal.pgen.1006619 (PMC5357065; doi:10.1371/journal.pgen.1006619)
Supplement: S3 Table — Functional enrichment within (A) 774 genes with edited sites and (B) 114 differentially edited genes. (XLSX) [file pgen.1006619.s012.xlsx]

## Sheet: all_edited_genes
S3A Table: functional enrichment within 774 genes with edited sites
Biological process
GO ID	GO term	P value
GO:0045956	positive regulation of calcium ion-dependent exocytosis	0.00088
GO:0045070	positive regulation of viral genome replication	0.00146
GO:0009099	valine biosynthetic process	0.00259
GO:0016024	CDP-diacylglycerol biosynthetic process	0.00259
GO:0060287	epithelial cilium movement involved in determination of left/right asymmetry	0.00331
GO:0009097	isoleucine biosynthetic process	0.00508
GO:0010163	high-affinity potassium ion import	0.00551
GO:0007225	patched ligand maturation	0.00551
GO:0042542	response to hydrogen peroxide	0.00684
GO:0035469	determination of pancreatic left/right asymmetry	0.00732
GO:0060539	diaphragm development	0.00813
GO:0016558	protein import into peroxisome matrix	0.00867
GO:1902600	hydrogen ion transmembrane transport	0.00938
GO:0006364	rRNA processing	0.00954
GO:0045492	xylan biosynthetic process	0.01164
GO:0010413	glucuronoxylan metabolic process	0.01164
GO:0001522	pseudouridine synthesis	0.01264
GO:0006816	calcium ion transport	0.01332
GO:0014824	artery smooth muscle contraction	0.0147
GO:0030001	metal ion transport	0.01474
GO:0016052	carbohydrate catabolic process	0.01838
GO:0009089	lysine biosynthetic process via diaminopimelate	0.0186
GO:0070301	cellular response to hydrogen peroxide	0.0195
GO:0006891	intra-Golgi vesicle-mediated transport	0.0215
GO:0006397	mRNA processing	0.02211
GO:0045836	positive regulation of meiotic nuclear division	0.02253
GO:0006661	phosphatidylinositol biosynthetic process	0.02277
GO:2000167	regulation of planar cell polarity pathway involved in neural tube closure	0.02288
GO:0071910	determination of liver left/right asymmetry	0.02388
GO:0000165	MAPK cascade	0.02626
GO:1902475	L-alpha-amino acid transmembrane transport	0.03251
GO:0035552	oxidative single-stranded DNA demethylation	0.03251
GO:0000381	regulation of alternative mRNA splicing, via spliceosome	0.03251
GO:0007219	Notch signaling pathway	0.03772
GO:0045493	xylan catabolic process	0.03782
GO:0048149	behavioral response to ethanol	0.03782
GO:0009880	embryonic pattern specification	0.04334
GO:0070536	protein K63-linked deubiquitination	0.04343
GO:0006303	double-strand break repair via nonhomologous end joining	0.04343
GO:0042744	hydrogen peroxide catabolic process	0.04433
GO:0090332	stomatal closure	0.04747
GO:0000288	nuclear-transcribed mRNA catabolic process, deadenylation-dependent decay	0.04765
GO:0060993	kidney morphogenesis	0.04778
GO:0006984	ER-nucleus signaling pathway	0.04778
GO:0072189	ureter development	0.04934
GO:0071908	determination of intestine left/right asymmetry	0.04934
GO:0071909	determination of stomach left/right asymmetry	0.04934
GO:0048496	maintenance of organ identity	0.04934
GO:0010351	lithium ion transport	0.04934
GO:0071549	cellular response to dexamethasone stimulus	0.04934
GO:0019236	response to pheromone	0.04934
GO:0009651	response to salt stress	0.04945
Cellular component
GO ID	GO term	P value
GO:0016363	nuclear matrix	0.0083
GO:0071001	U4/U6 snRNP	0.0102
GO:0005682	U5 snRNP	0.0102
GO:0022626	cytosolic ribosome	0.0138
GO:0000324	fungal-type vacuole	0.0139
GO:0016607	nuclear speck	0.0179
GO:0009941	chloroplast envelope	0.0294
GO:0005654	nucleoplasm	0.031
GO:0046540	U4/U6 x U5 tri-snRNP complex	0.0468
Molecular function
GO ID	GO term	P value
GO:0004721	phosphoprotein phosphatase activity	0.00068
GO:0008332	low voltage-gated calcium channel activity	0.00415
GO:0003746	translation elongation factor activity	0.00469
GO:0008158	hedgehog receptor activity	0.00562
GO:0046556	alpha-L-arabinofuranosidase activity	0.00595
GO:0000166	nucleotide binding	0.00683
GO:0008198	ferrous iron binding	0.00715
GO:0036307	23S rRNA (adenine(2030)-N(6))-methyltransferase activity	0.00878
GO:0009982	pseudouridine synthase activity	0.01124
GO:0000405	bubble DNA binding	0.01585
GO:0016018	cyclosporin A binding	0.02005
GO:0003684	damaged DNA binding	0.02395
GO:0003906	DNA-(apurinic or apyrimidinic site) lyase activity	0.03475
GO:0019104	DNA N-glycosylase activity	0.03475
GO:0043734	DNA-N1-methyladenine dioxygenase activity	0.03498
GO:0051747	cytosine C-5 DNA demethylase activity	0.03498
GO:0018024	histone-lysine N-methyltransferase activity	0.03852
GO:0004298	threonine-type endopeptidase activity	0.04067
GO:0003729	mRNA binding	0.04144
GO:0000049	tRNA binding	0.04602
GO:0030170	pyridoxal phosphate binding	0.04849

## Sheet: diff_edited_genes
S3B Table: functional enrichment within 114 differentially edited genes
Biological process
GO ID	GO term	P value
GO:0015986	ATP synthesis coupled proton transport	0.0097
GO:0006289	nucleotide-excision repair	0.0128
GO:2000696	regulation of epithelial cell differentiation involved in kidney development	0.0164
GO:0001935	endothelial cell proliferation	0.0164
GO:0051593	response to folic acid	0.0164
GO:0006432	phenylalanyl-tRNA aminoacylation	0.0164
GO:0031669	cellular response to nutrient levels	0.0196
GO:0019918	peptidyl-arginine methylation, to symmetrical-dimethyl arginine	0.0197
GO:0035871	protein K11-linked deubiquitination	0.0197
GO:0002526	acute inflammatory response	0.0197
GO:0008258	head involution	0.0197
GO:0042078	germ-line stem cell division	0.0229
GO:0007280	pole cell migration	0.0229
GO:0032355	response to estradiol	0.0229
GO:0046854	phosphatidylinositol phosphorylation	0.0268
GO:0001522	pseudouridine synthesis	0.0288
GO:0008356	asymmetric cell division	0.0326
GO:0070370	cellular heat acclimation	0.0358
GO:0042059	negative regulation of epidermal growth factor receptor signaling pathway	0.0358
GO:0008595	anterior/posterior axis specification, embryo	0.0358
GO:0035552	oxidative single-stranded DNA demethylation	0.0389
GO:0043542	endothelial cell migration	0.0389
GO:0048149	behavioral response to ethanol	0.0421
GO:0006906	vesicle fusion	0.0421
GO:0045471	response to ethanol	0.0447
GO:0006177	GMP biosynthetic process	0.0453
GO:0001709	cell fate determination	0.0453
GO:0006303	double-strand break repair via nonhomologous end joining	0.0453
GO:0070536	protein K63-linked deubiquitination	0.0453
GO:0030166	proteoglycan biosynthetic process	0.0484
GO:0046379	extracellular polysaccharide metabolic process	0.0484
GO:0002943	tRNA dihydrouridine synthesis	0.0484
Cellular component
GO ID	GO term	P value
GO:0032580	Golgi cisterna membrane	0.0029
GO:0000220	vacuolar proton-transporting V-type ATPase, V0 domain	0.0201
GO:0070419	nonhomologous end joining complex	0.0201
GO:0043564	Ku70:Ku80 complex	0.0201
GO:0061176	type Ib terminal bouton	0.0241
GO:0061177	type Is terminal bouton	0.0241
GO:0019773	proteasome core complex, alpha-subunit complex	0.0241
GO:0097482	muscle cell postsynaptic density	0.032
GO:0019897	extrinsic component of plasma membrane	0.0398
Molecular function
GO ID	GO term	P value
GO:0003684	damaged DNA binding	0.00047
GO:0008198	ferrous iron binding	0.00511
GO:0004111	creatine kinase activity	0.01713
GO:0004826	phenylalanine-tRNA ligase activity	0.01713
GO:0003922	GMP synthase (glutamine-hydrolyzing) activity	0.02052
GO:0004617	phosphoglycerate dehydrogenase activity	0.0239
GO:0000900	translation repressor activity, nucleic acid binding	0.0239
GO:0004090	carbonyl reductase (NADPH) activity	0.02726
GO:0000405	bubble DNA binding	0.02726
GO:0009982	pseudouridine synthase activity	0.02767
GO:0009678	hydrogen-translocating pyrophosphatase activity	0.03062
GO:0005516	calmodulin binding	0.03105
GO:0019104	DNA N-glycosylase activity	0.04006
GO:0051747	cytosine C-5 DNA demethylase activity	0.04062
GO:0043734	DNA-N1-methyladenine dioxygenase activity	0.04062
GO:0004298	threonine-type endopeptidase activity	0.04393
GO:0008536	Ran GTPase binding	0.04393
GO:0003906	DNA-(apurinic or apyrimidinic site) lyase activity	0.04657
GO:0045735	nutrient reservoir activity	0.04723
GO:0003943	N-acetylgalactosamine-4-sulfatase activity	0.04723
